# Supplementary material for: SETBP1 induces transcription of a network of development genes by acting as an epigenetic hub
Source: PubMed Central journal article supplement (PMC5989213; doi:10.1038/s41467-018-04462-8), 2018-06-06
Supplement: 41467_2018_4462_MOESM3_ESM.pdf [file 41467_2018_4462_MOESM3_ESM.pdf]

## Description of Additional Supplementary Files

**File Name: Supplementary Movie 1**

**Description:** (SM1\_GFP): 3D reconstruction resulting from 2-photon microscopy on GFP electroporated cortices (2 days) after tissue clarification (X-Clarity system).

**File Name: Supplementary Movie 2**

**Description:** (SM2\_G870S): 3D reconstruction resulting from 2-photon microscopy on SETBP1 electroporated cortices (2 days) after tissue clarification (X-Clarity system).

**File Name: Supplementary Data 1**

**Description:** Genomic regions bound by SETBP1-G870S.

**File Name: Supplementary Data 2**

**Description:** Genes whose promoter is ectopically bound by SETBP1-G870S.

**File Name: Supplementary Data 3**

**Description:** List of 2687 genes differentially expressed between SETBP1-G870S and Empty 293 FLP-In lines.

**File Name: Supplementary Data 4**

**Description:** Genes differentially expressed in SETBP1-G870S vs. Empty 293 FLP-In lines whose promoter is occupied by SETBP1-G870S.

**File Name: Supplementary Data 5**

**Description:** Differentially expressed genes characterized by increase in H3K4me2 and H3K9ac marks.

**File Name: Supplementary Data 6**

**Description:** Co-immunoprecipitation/mass-spectrometry data.

**File Name: Supplementary Data 7**

**Description:** Binned (200bp), normalized ATAC-Seq data for 293 FLP-In Empty.

**File Name: Supplementary Data 8**

**Description:** Binned (200bp), normalized ATAC-Seq data for 293 FLP-In SETBP1-WT.

**File Name: Supplementary Data 9**

**Description:** Binned (200bp), normalized ATAC-Seq data for 293 FLP-In SETBP1-G870S.

**File Name: Supplementary Data 10**

**Description:** MECOM target genes involved in hematopoietic stem-cell proliferation and myeloid differentiation.
